# Supplementary material for: Micellar-cluster association of ureidopyrimidone functionalized monochelic polybutadiene
Source: Royal Society of Chemistry journal article supplement (doi:10.1039/c3py01002c), 2013-09-09
Supplement: c3py01002c.pdf [file c3py01002c.pdf]

## Supporting Information

### Micellar-Cluster Association of Ureidopyrimidone Functionalized Monochelic Polybutadiene

Sachin Bobade,<sup>a</sup> Thomas Malmgren<sup>a</sup> and Durairaj Baskaran<sup>a,b,\*</sup>

<sup>a</sup>Department of Chemistry, University of Tennessee, Knoxville, TN 37996, USA

<sup>b</sup>AZ-Electronic Materials USA Corp, 70 Meister Avenue, Somerville, NJ 08807

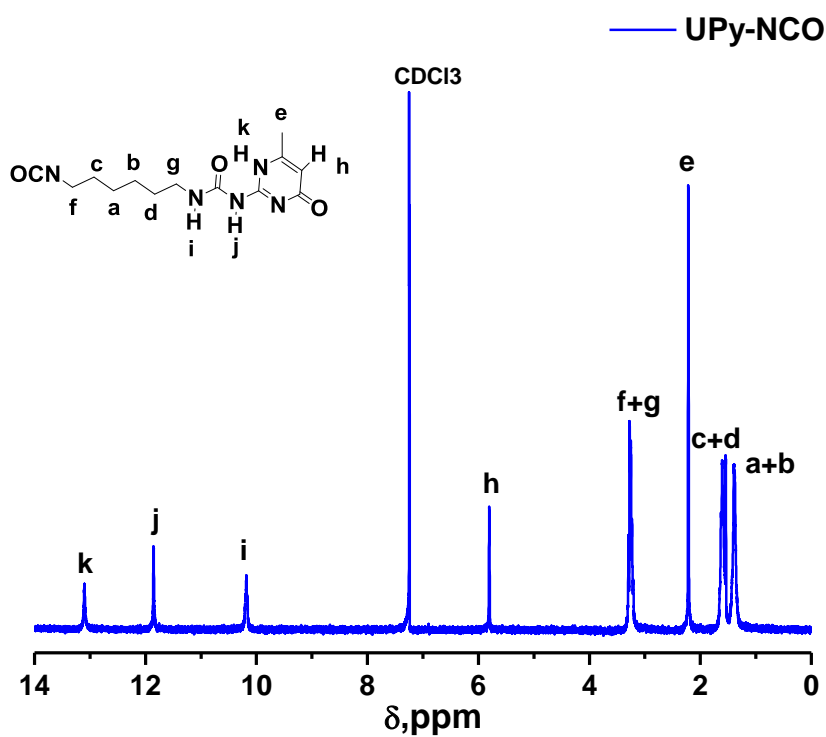

Figure S1: <sup>1</sup>H NMR spectrum of UPy-Synthon

\* Corresponding author. e-mail: [durairaj.baskaran@azem.com](mailto:durairaj.baskaran@azem.com) or [baskaran@utk.edu](mailto:baskaran@utk.edu)

\* Corresponding author. e-mail: [durairaj.baskaran@azem.com](mailto:durairaj.baskaran@azem.com) or [baskaran@utk.edu](mailto:baskaran@utk.edu)

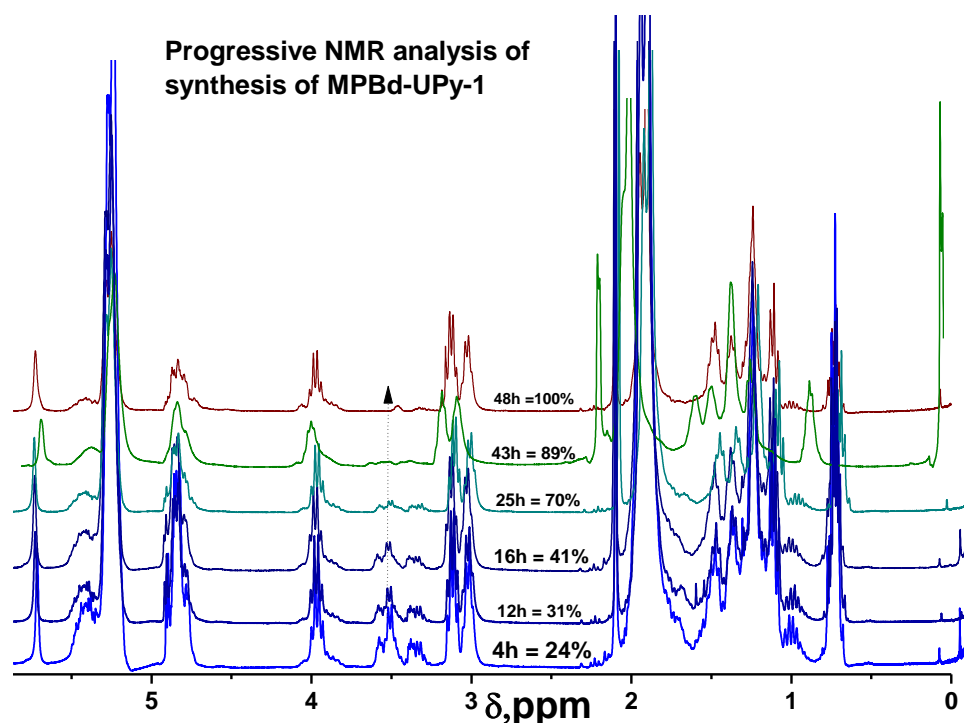

**Figure S2:** Progress of coupling reaction between UPy-NCO and MPBd-OH-1 in the presence of trace amounts of co-distilled stabilizer ethanol in chloroform. The arrow points to the disappearance of terminal -CH<sub>2</sub>- group of MPBd-OH via coupling.

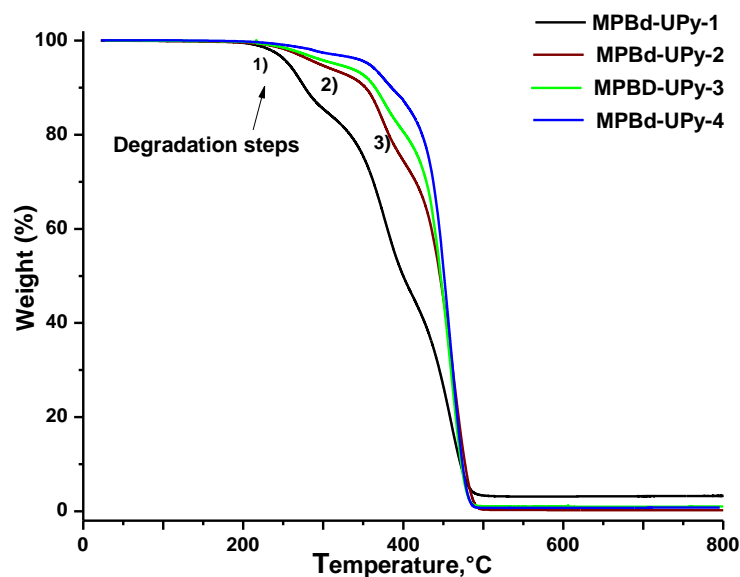

**Figure S3:** Thermogravimetric analysis of MPBd-UPy-1-4. Different steps (1-3) are indicative of end-group and main segment cleavage and decompositions.

\* Corresponding author. e-mail: [durairaj.baskaran@azem.com](mailto:durairaj.baskaran@azem.com) or [baskaran@utk.edu](mailto:baskaran@utk.edu)

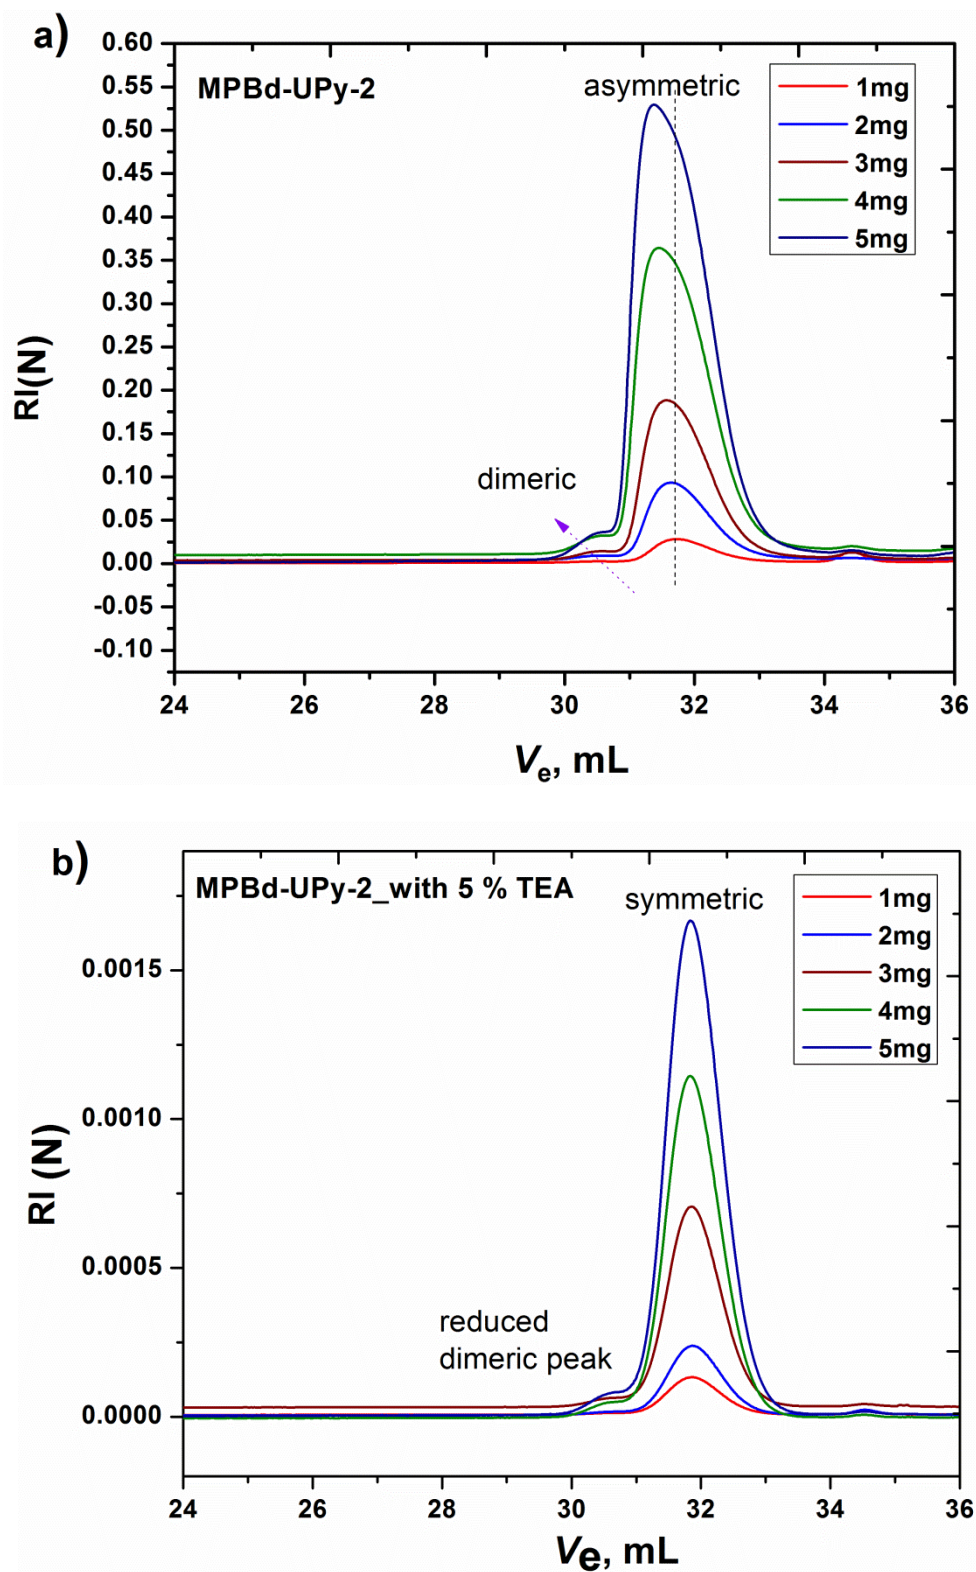

**Figure S4:** Normalized concentration dependent (1-5 mg/mL) GPC eluograms of MPBd-UPy-2 (a) and in presence of 5% triethylamine (b).

**Table S1:** Concentration dependent GPC of the MPBd-UPy-2 and MPBd-OH –2

| Sample concentration (mg/mL) | MPBd-OH            |                      |           | MPBd-UPy                         |                                  |           |
|------------------------------|--------------------|----------------------|-----------|----------------------------------|----------------------------------|-----------|
|                              | $M_n$ SEC, (g/mol) | $M_{n(max)}$ (g/mol) | $M_w/M_n$ | $M_n$ , SEC <sup>c</sup> (g/mol) | $M_n$ , NMR <sup>d</sup> (g/mol) | $M_w/M_n$ |
| 1                            | 1,720              | 1,810                | 1.048     | 1,890                            | 2,120                            | 1.064     |
| 2                            | 1,700              | 1,780                | 1.049     | 1,920                            | 2,240                            | 1.074     |
| 3                            | 1,680              | 1,760                | 1.050     | 1,980                            | 2,330                            | 1.068     |
| 4                            | 1670               | 1,750                | 1.051     | 2,020                            | 2,470                            | 1.077     |
| 5                            | 1670               | 1,750                | 1.052     | 2,590                            | 2,590                            | 1.077     |

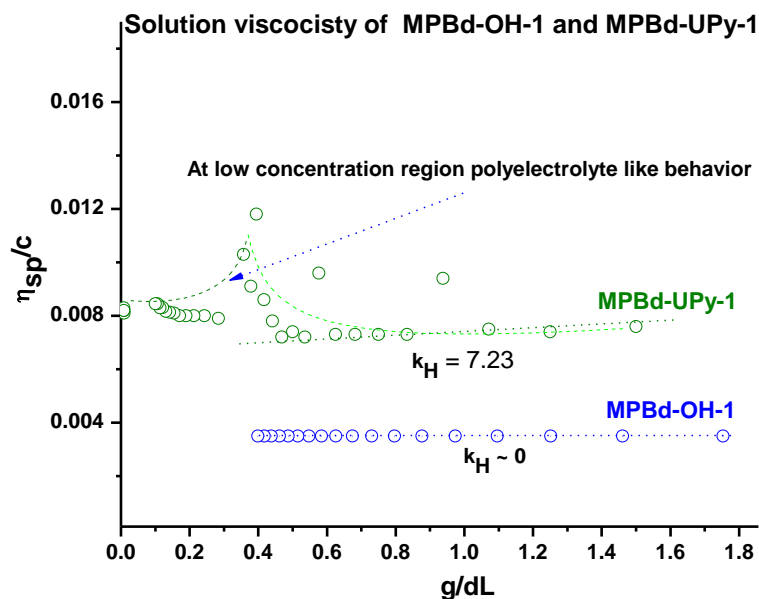

**Figure S5:** Solution viscosity of the MPBd-UPy-1 in toluene. A linear region at higher concentration and non-linear region at lower concentration can be seen. An upward increase of viscosity at low concentration shows behavior like polyelectrolyte in water.

\* Corresponding author. e-mail: [durairaj.baskaran@azem.com](mailto:durairaj.baskaran@azem.com) or [baskaran@utk.edu](mailto:baskaran@utk.edu)

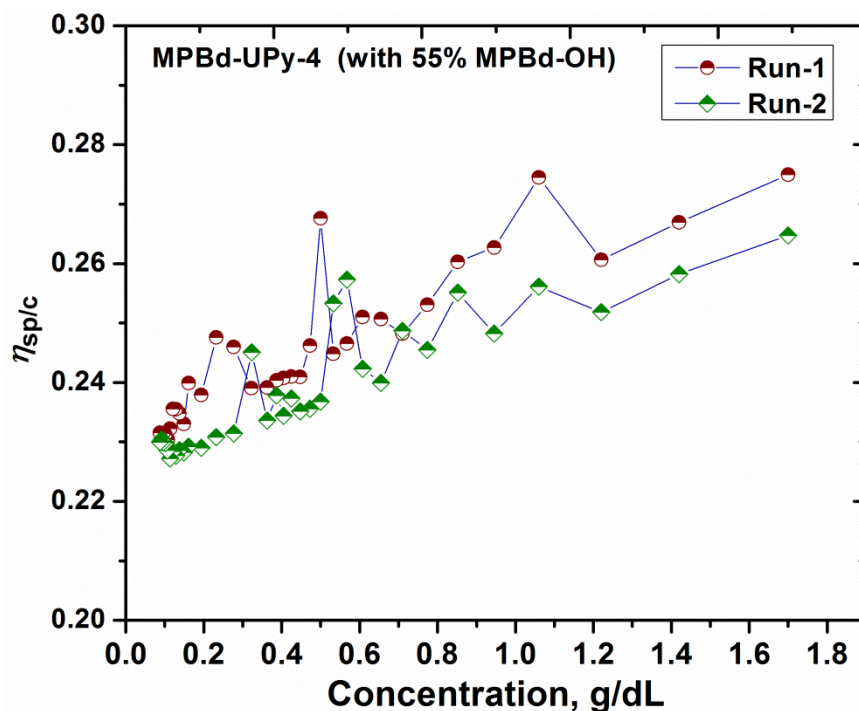

**Figure S6:** Repetition experiments of the mixture of MPBd-UPy-4 with MPBd-OH (55 wt. %) in toluene as an attempt to find error limits as requested by the reviewer #2 during the revision. The sample which was stored in a refrigerator over 6 months was measured again for this purpose.

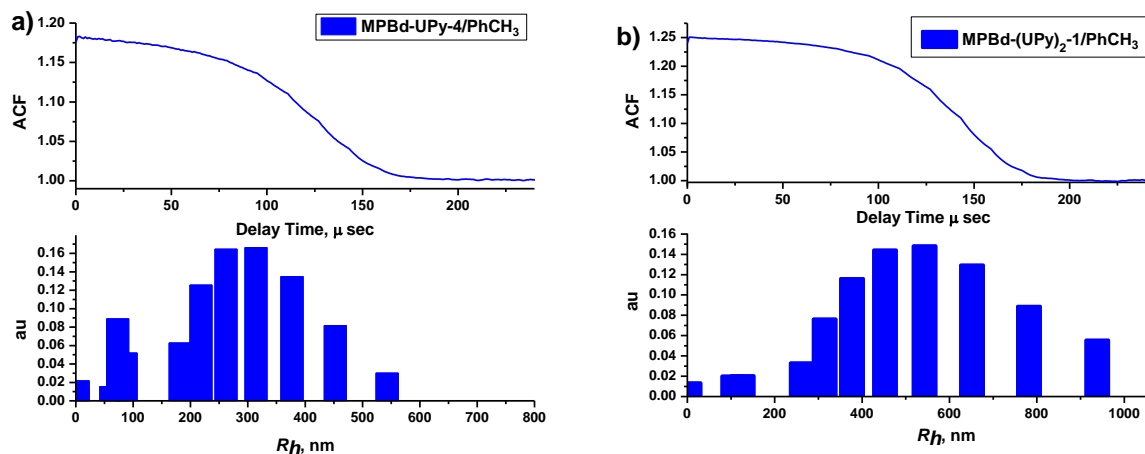

**Figure S7:** Representative histograms of the a) MPBd-UPy-4 and b) MPBd-(UPy)<sub>2</sub>-1 at 25°C

\* Corresponding author. e-mail: [durairaj.baskaran@azem.com](mailto:durairaj.baskaran@azem.com) or [baskaran@utk.edu](mailto:baskaran@utk.edu)

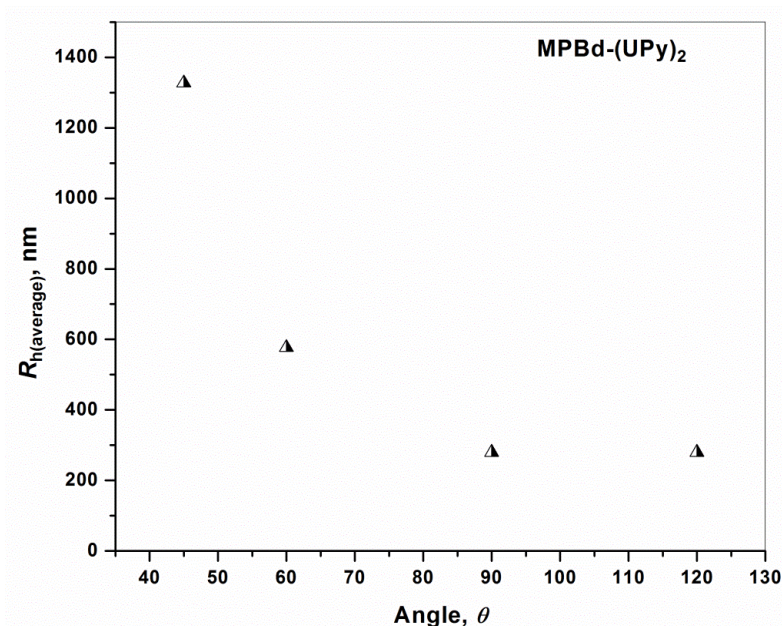

**Figure S8:** Average population of larger size micelles ( $R_{h,average}$ ) in a toluene solution of MPBd-(UPy)<sub>2</sub> at different angles. Sample concentration was 35 mg/mL, and analyzed at 25 °C

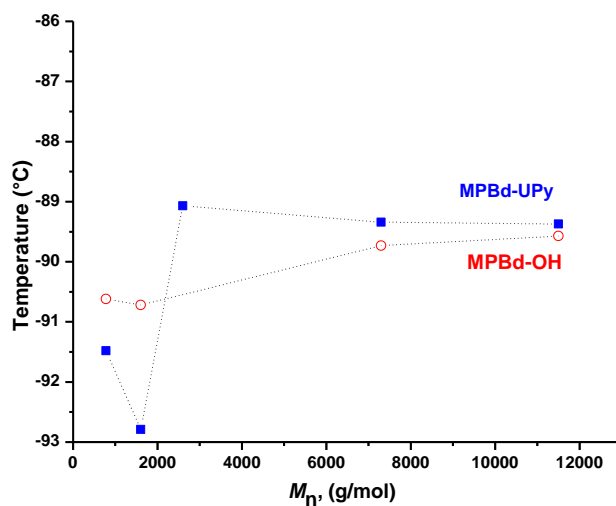

**Figure S9:** Plot of glass transition ( $T_g$ ) temperature  $v_s$  molecular weight of polybutadiene

\* Corresponding author. e-mail: [durairaj.baskaran@azem.com](mailto:durairaj.baskaran@azem.com) or [baskaran@utk.edu](mailto:baskaran@utk.edu)

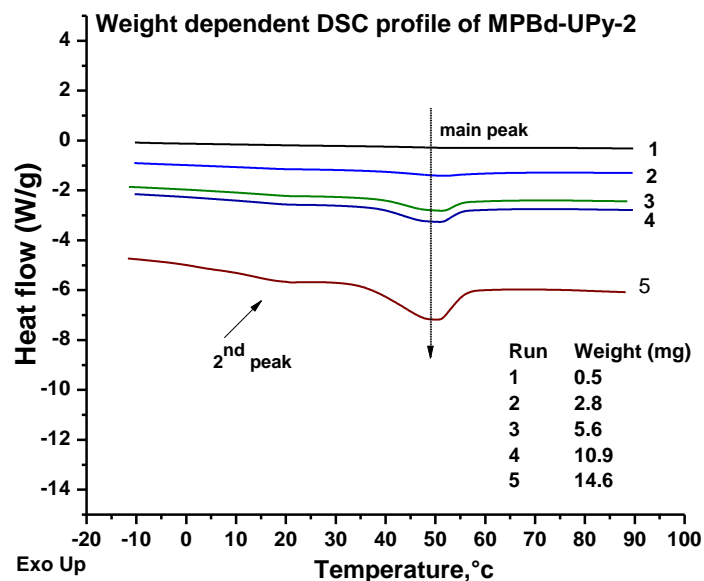

**Figure S10:** Effect of sample weight on the DSC endothermic peak MPBd-UPy-2

**Table S2:** Enthalpy values of MPBd-UPy

| Sample     | Heating cycle   | 1 <sup>st</sup> peak      |                | 2 <sup>nd</sup> peak      |                |
|------------|-----------------|---------------------------|----------------|---------------------------|----------------|
|            |                 | $T_{1\text{deagg.}}$ (°C) | Enthalpy (J/g) | $T_{2\text{deagg.}}$ (°C) | Enthalpy (J/g) |
| MPBd-UPy-1 | 1 <sup>st</sup> | 6.49                      | 1.122          | 70.87                     | 18.980         |
|            | 2 <sup>nd</sup> | 6.69                      | 1.245          | 70.62                     | 18.430         |
|            | 3 <sup>rd</sup> | 7.24                      | 1.147          | 70.67                     | 18.310         |
| MPBd-UPy-2 | 1 <sup>st</sup> | 20.78                     | 0.495          | 52.52                     | 6.258          |
|            | 2 <sup>nd</sup> | 19.60                     | 0.483          | 51.00                     | 5.598          |
|            | 3 <sup>rd</sup> | 19.20                     | 0.462          | 50.61                     | 5.80           |
| MPBd-UPy-3 | 1 <sup>st</sup> | 1.69                      | 0.273          | 46.77                     | 6.564          |
|            | 2 <sup>nd</sup> | -2.03                     | 0.160          | 48.72                     | 6.280          |
|            | 3 <sup>rd</sup> | -2.40                     | 0.138          | 48.43                     | 5.980          |
| MPBd-UPy-4 | 1 <sup>st</sup> | None                      | None           | 48.02                     | 2.642          |
|            | 2 <sup>nd</sup> | None                      | None           | 51.55                     | 2.730          |
|            | 3 <sup>rd</sup> | None                      | None           | 53.52                     | 2.519          |

\* Corresponding author. e-mail: [durairaj.baskaran@azem.com](mailto:durairaj.baskaran@azem.com) or [baskaran@utk.edu](mailto:baskaran@utk.edu)

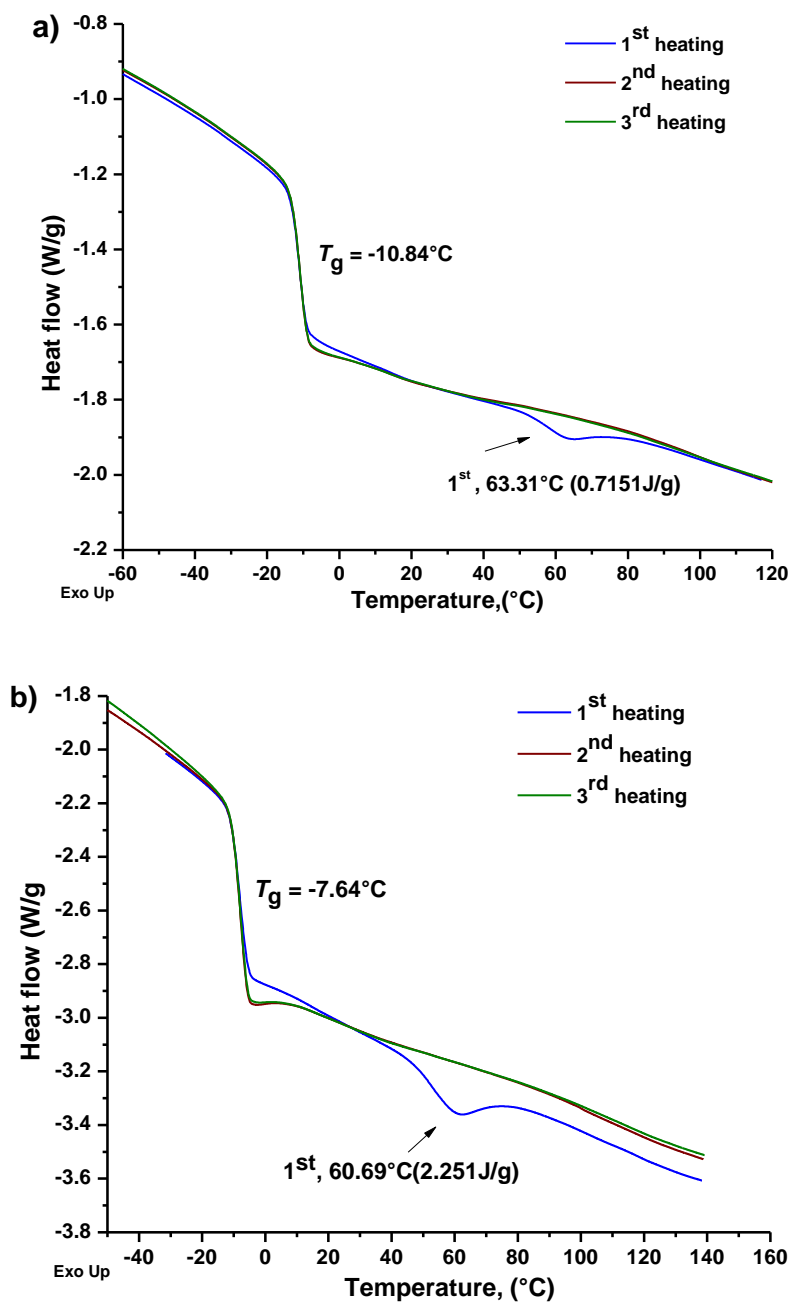

**Figure S11:** DSC profile of MPBd-UPy, 7 kg/mol with ~94 % 1,2 vinyl contents; a) after first run, b) after ~3 months at  $30^\circ\text{C}$ .



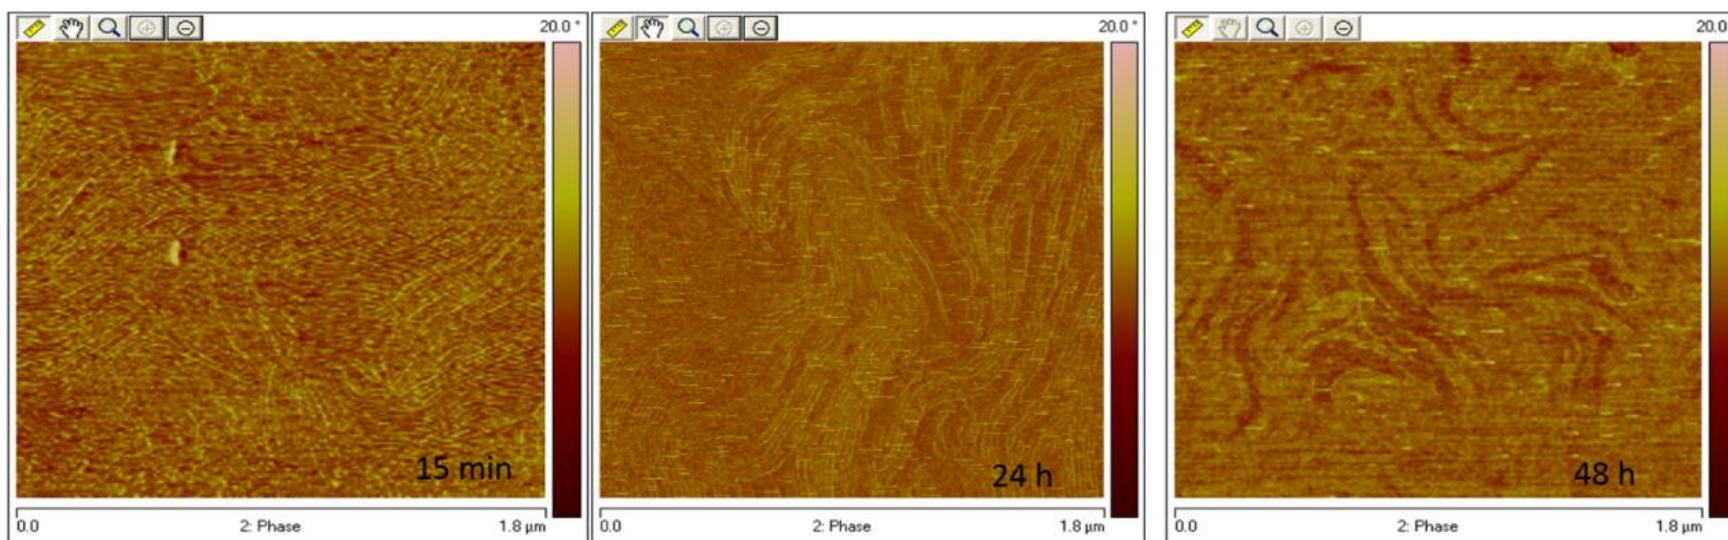

**Figure S12:** Time dependent morphology of MPBd-UPy-4 (from left to right, 15 min, 24 h, and 48 h after drop coating a thin film on freshly cleaved mica). The images were taken without changing the position of the sample in the AFM over 48 h. The size of the fibrous looking associated micellar clusters changes gradually over time indicating surface mobility of the associates induced by PBd segments (low  $T_g$ ) at room temperature. Micellar cluster sizes are in the range of ~ 25-27 nm.

\* Corresponding author. e-mail: [durairaj.baskaran@azem.com](mailto:durairaj.baskaran@azem.com) or [baskaran@utk.edu](mailto:baskaran@utk.edu)
